# Supplementary material for: Revealing nanomechanical deformation at the interface and degradation in all-thin-film inorganic electrochromic devices
Source: Royal Society of Chemistry journal article supplement (doi:10.1039/d2nr05558a), 2022-12-28
Supplement: d2nr05558a1.pdf [file d2nr05558a1.pdf]

## Supporting Information

### **Revealing Nanomechanical Deformation at Interface and Degradation in All-Thin-Film Inorganic Electrochromic Device**

*Dongmei Dong, Lihua Lou, Kazuo Orikasa Lopez, Arvind Agarwal, Shekhar Bhansali*

#### **Contents of Supporting Information**

1. Configuration of electrochromic device
2. Nanoindentation measurement cross-section analysis
3. Charge/Discharge of WO<sub>3</sub> and NiO by multi-step chronoamperometry (CA)
4. Optical modulation of electrochromic WO<sub>3</sub> and NiO films
5. Structural characterization of electrochromic thin films
6. SEM and EDS Analysis of electrochromic WO<sub>3</sub> thin films

## 1. Configuration of the electrochromic device

As depicted in Fig. S1, the ECD consists of a cathodic EC layer  $\text{WO}_3$  on transparent electrode ITO, an anodic EC layer  $\text{NiO}$  on ITO, and between them an electrolyte containing  $\text{Li}$  cations and anions. It is widely accepted the EC effect involves the simultaneous insertion/extraction of electrons provided by an external potential and  $\text{Li}$  cations from the electrolyte and the subsequent formation of coloring centers  $\text{W}^{5+}$  and  $\text{Ni}^{3+}$  or bleaching  $\text{W}^{6+}$  and  $\text{Ni}^{2+}$ .<sup>1</sup> The cathodic W oxide film, which has high transparency in the oxidized state  $\text{W}^{6+}$  and exhibits blue color when it is reduced to  $\text{W}^{5+}$  by electron insertion together with  $\text{Li}^+$ , or vice versa, and the anodic Ni oxide film, which has an opposite electrochromism to the former, or turns to be brownish in  $\text{Ni}^{3+}$  states accompanying the extraction of electrons and  $\text{Li}^+$ .

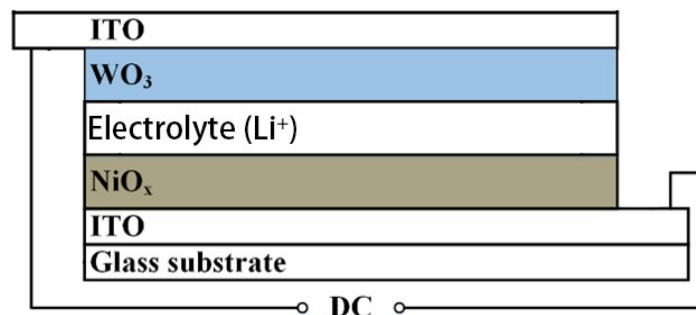

**Fig. S1** Schematic cross-sectional view of design and working principle of the ECD: ITO/ $\text{WO}_3$ /Electrolyte ( $\text{Li}^+$ )/ $\text{NiO}$ /ITO.

## 2. Nanoindentation measurement cross-section analysis

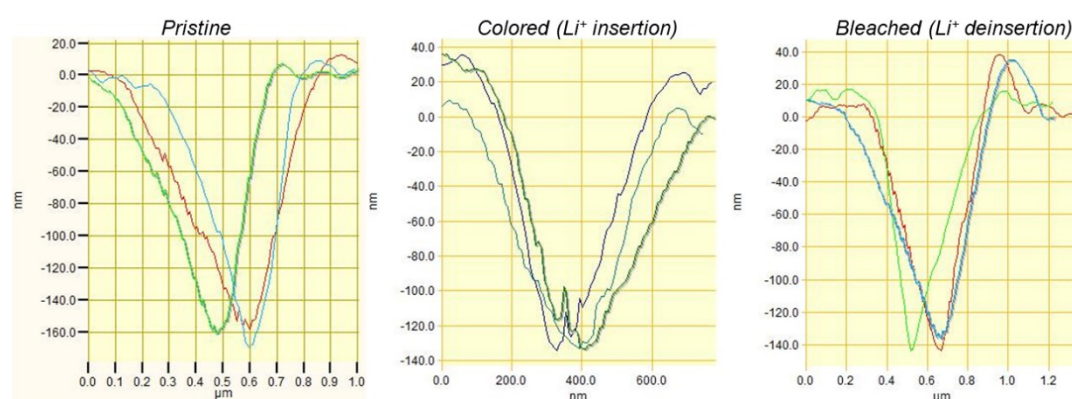

**Fig. S2** The cross-section profile along with the line of three repetitive nanoindentation measurements of pristine, colored ( $\text{Li}^+$  insertion) and bleached ( $\text{Li}^+$  de-insertion)  $\text{WO}_3$  film.

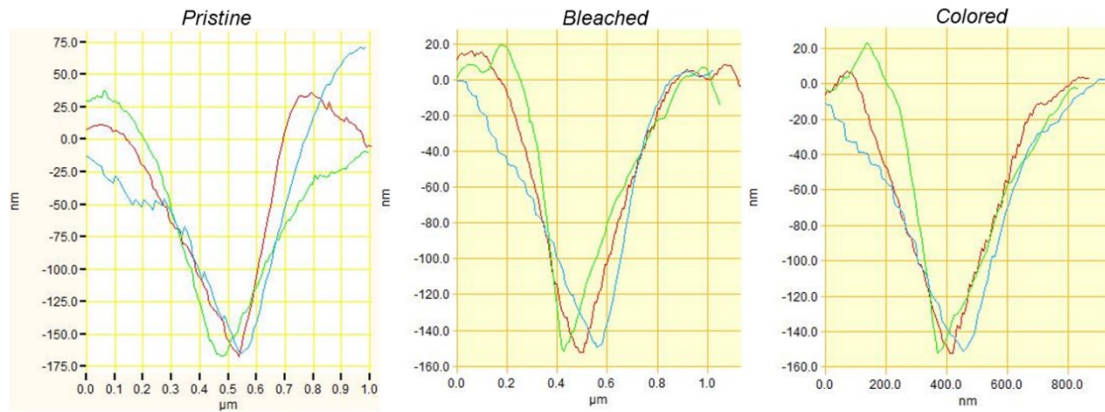

**Fig. S3** The cross-section profile along with the line of three repetitive nanoindentation measurements of pristine, colored and bleached NiO film.

### 3. Charge/Discharge of $\text{WO}_3$ and NiO by multi-step chronoamperometry (CA)

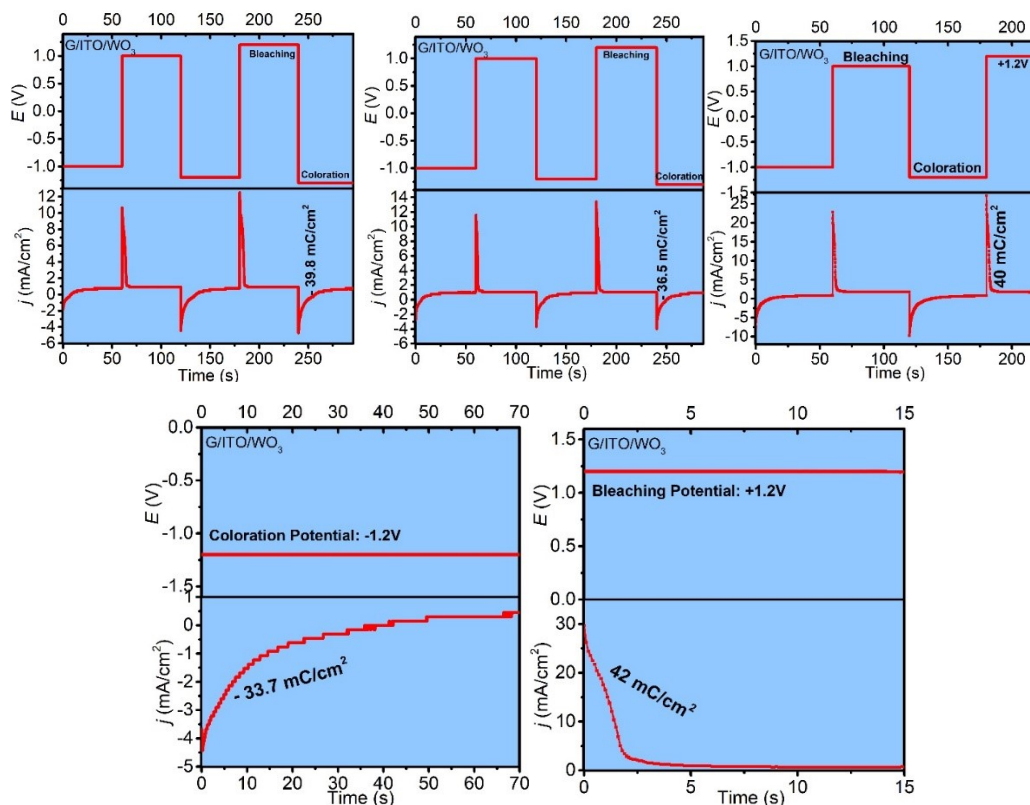

**Fig. S4** The asymmetry in  $\text{WO}_3$  coloration/bleaching response in multi-step chronoamperometry characterizations: much faster response time  $\sim 2\text{s}$  in the bleaching ( $\text{Li}^+$  de-insertion).

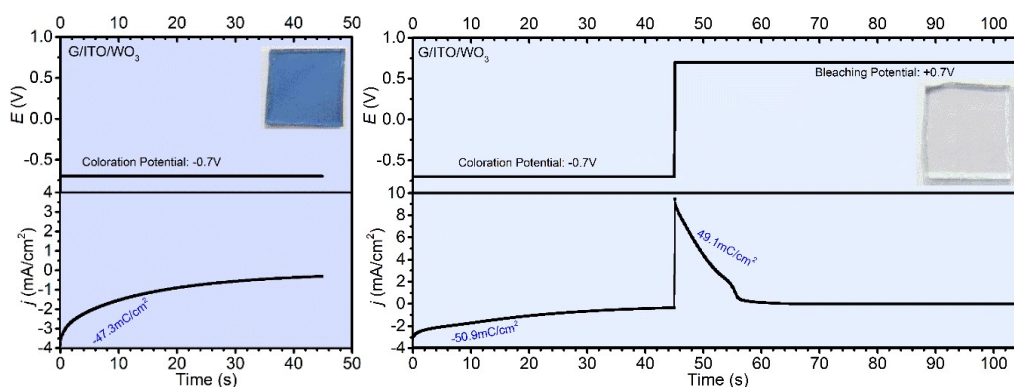

**Fig. S5** Chronoamperometry (CA)/charge capacity of WO<sub>3</sub> at colored/bleached state. Inset is colored/bleached WO<sub>3</sub> digital photos.

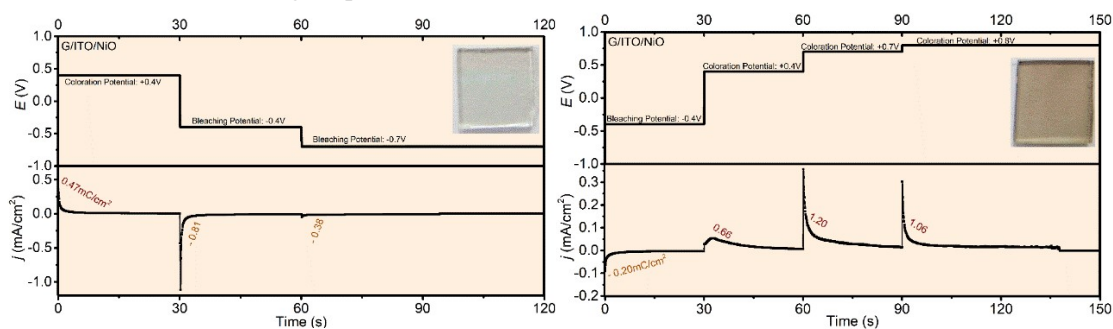

**Fig. S6** Multi-step chronoamperometry (CA)/charge capacity of NiO at bleached/colored state. Inset is bleached/colored NiO digital photos.

#### 4. Optical modulation of electrochromic WO<sub>3</sub> and NiO films

The spectra properties of EC WO<sub>3</sub> and NiO films colored and bleached by a step potential are investigated on a spectrometer after the sample has been subjected to 60 s in LiClO<sub>4</sub>-PC electrolyte. The cathodic EC WO<sub>3</sub> films are colored by applying negative step voltages ranging from 0 to -3.5 V and the anodic NiO films get colored by positive voltages from 0 to +3.0 V. The results of the spectral transmission of WO<sub>3</sub> and NiO after cycling in two modes are shown in Fig.S7-9. The transmittance of both colored WO<sub>3</sub> and NiO decreases continuously due to significant reduction reactions of W<sup>6+</sup> to W<sup>5+</sup> and oxidation of Ni<sup>2+</sup> to Ni<sup>3+</sup>, respectively, by exerting an increasing potential. At fully colored and bleached states in modulation response, the optical properties are studied with the optical spectroscopy. For NiO, in the modulation response, the absorption band present a visible blue shift from ~460 to ~430 nm from coloration to following bleaching, which may be induced by the charge transfer. In general, for all NiO curves, the wide absorption valley ranges from ~500 to ~900 nm, and what is interesting, at the same wavelength range, the corresponding transmittance remains at a relatively high level, from which it can be indicated here the less absorbed, the more is passed through for transmission. This could equally apply to WO<sub>3</sub>. In coloration, great changes have taken place in the film appearance (transparent→light blue→dark blue), manifested by the sharp increase in the intensity of its absorption in the wavelength > 600 nm. This almost shuts the window for the transmittance of the orange and red light, so WO<sub>3</sub> presents a blue colored state.



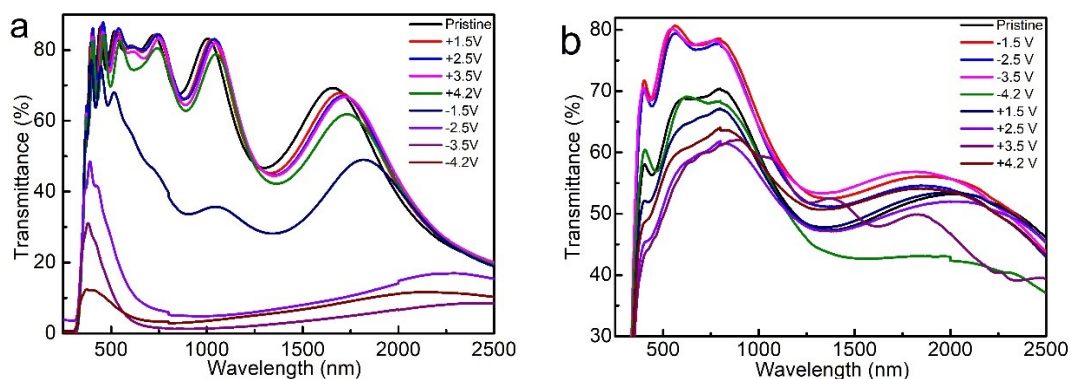

**Fig. S7** Optical transmittance spectra of cathodic electrochromic  $\text{WO}_3$  as a function of potential. (The symbol “+” correlates to bleaching for cathodic  $\text{WO}_3$ ; In accordance, the symbol “-” correlates to coloration for cathodic  $\text{WO}_3$ . Solid line: bleached state; Dashed line: colored state; For clarity, the experimental sequence of applied potentials is indicated by a vertical arrow to the right side of the legend.)

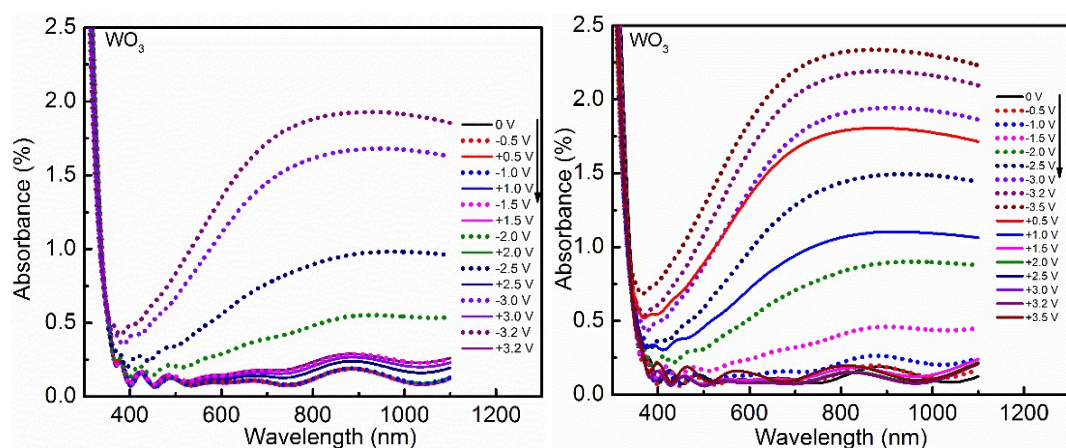

**Fig. S8** Optical absorbance spectra of cathodic electrochromic  $\text{WO}_3$  as a function of potential.

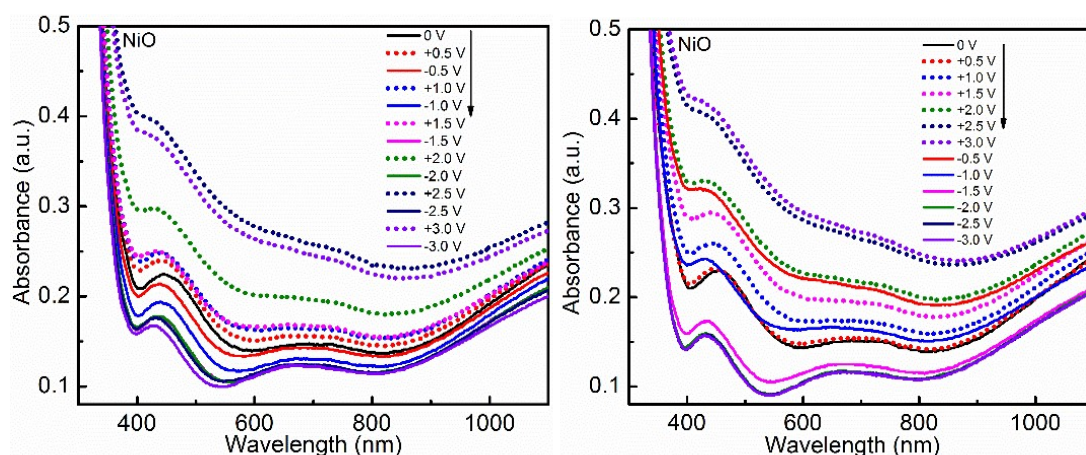

**Fig. S9** Optical absorbance spectra of anodic electrochromic  $\text{NiO}$  as a function of potential. (The symbol “+” correlates to coloration for anodic  $\text{NiO}$ ; In accordance, the symbol “-” correlates to bleaching for anodic  $\text{NiO}$ . Solid line: bleached state; Dashed line: colored state.)

## 5. Structural characterization of electrochromic thin films

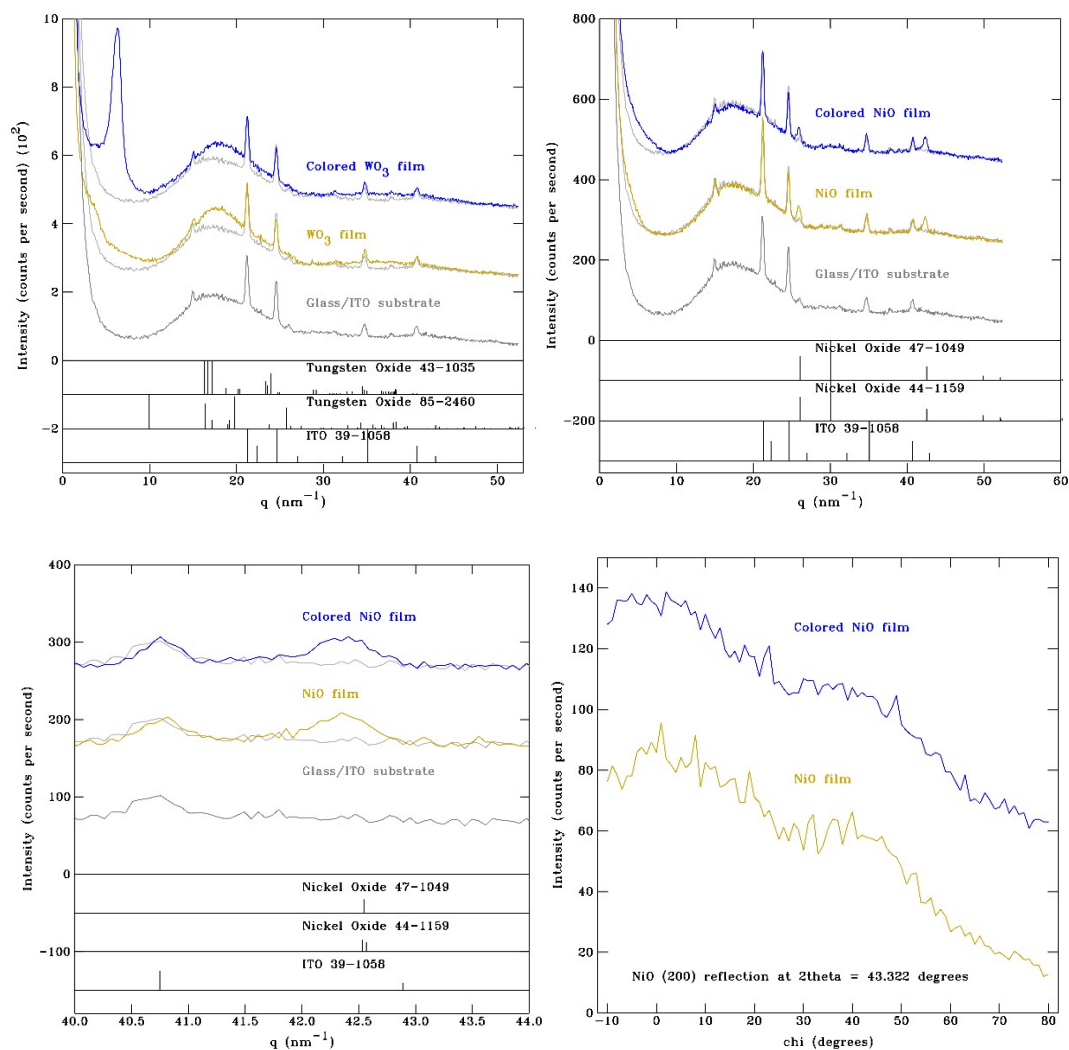

**Fig. S10** XRD spectra of electrochromic  $\text{WO}_3$  and NiO at initial, transparent and colored states.

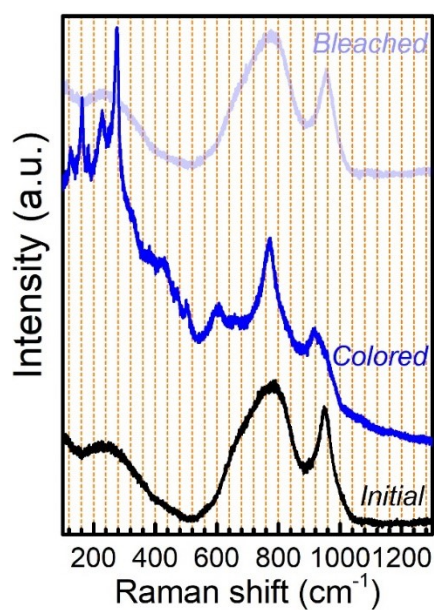

**Fig. S11** Raman spectra of electrochromic  $\text{WO}_3$  at initial, colored and bleached states.

The XRD patterns of the films are presented in Fig. S10. NiO films show a polystalline



NaCl-type structure indexed as (111), (200), (220) and (311) crystal planes. No additional diffraction peaks representing other phases such as  $\text{Ni}_2\text{O}_3$  or  $\text{LiNiO}_2$  or any other compounds appear for cycled films. As described in Kitao et al.,<sup>2</sup> the  $\text{Ni}^{3+}$  ions are performed as color centers in films. Thus, the brownish samples contain not only  $\text{Ni}^{2+}$  ions but also a certain amount of  $\text{Ni}^{3+}$  ions, and they exist in amorphous state.

## 6. SEM and EDS Analysis of electrochromic $\text{WO}_3$ thin films

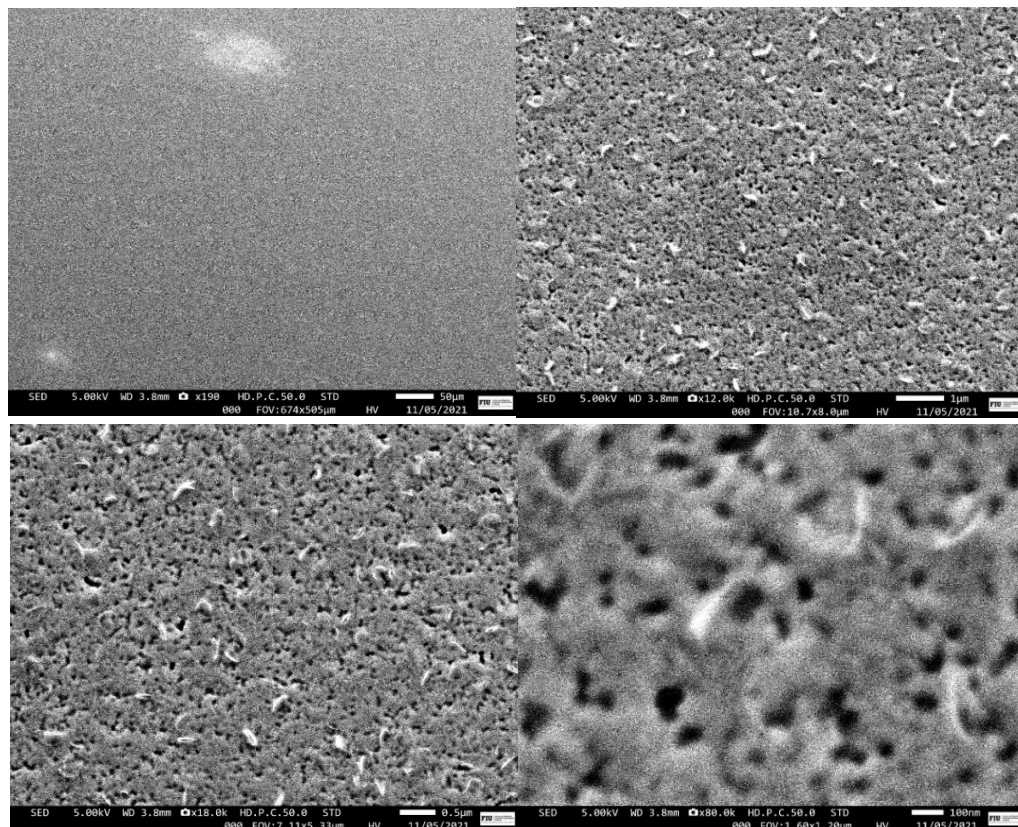

Fig. S12 SEM of electrochromic  $\text{WO}_3$  films.

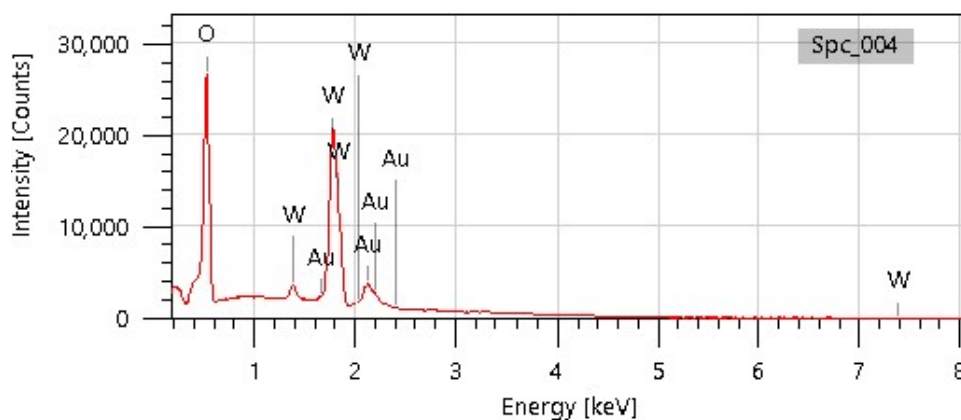

Fig. S13 EDS analysis of  $\text{WO}_3$  thin films.

**Table 1** Elemental analysis of WO<sub>3</sub> thin films

| Element | Line | Mass%      | Atom%      |
|---------|------|------------|------------|
| O       | K    | 10.92±0.03 | 58.79±0.14 |
| W       | M    | 73.04±0.25 | 34.20±0.12 |
| Au      | M    | 16.03±0.17 | 7.01±0.07  |
| Total   |      | 100.00     | 100.00     |

## References

- [1] S. Zhang, S. Cao, T. Zhang, A. Fisher, and J. Y. Lee, *Energy & Environ. Sci.* 2018, **2**, 11(10), 2884-2892.
- [2] Y. Wang, E. L. Runnerstrom and D. J. Milliron, *Annu. Rev. Chem. Biomol. Eng.* 2016, **7**, 283-304.
